# Supplementary material
Source: PubMed Central journal article supplement (PMC6538392)
Supplement: NIHMS1020406-supplement-Supplement.pdf [file NIHMS1020406-supplement-Supplement.pdf]

# Correlation of platinum cytotoxicity to drug-DNA adduct levels in a breast cancer cell line panel

*Sisi Wang<sup>†,1,2</sup>, Tiffany M. Scharadin<sup>†,2,3</sup>, Maike Zimmermann<sup>†,2</sup>, Michael A. Malfatti<sup>§</sup>, Kenneth W. Turteltaub<sup>§</sup>, Ralph de Vere White<sup>§</sup>, Chong-Xian Pan<sup>†,4</sup>, Paul T. Henderson<sup>†,2,\*</sup>*

<sup>†</sup> Department of Internal Medicine, Division of Hematology and Oncology, University of California Davis, Sacramento, California 95817, United States

<sup>‡</sup> Accelerated Medical Diagnostics Incorporated, Berkeley, California 95618, United States

<sup>§</sup> Lawrence Livermore National Laboratory, Livermore CA, USA

<sup>#</sup> Department of Urology, University of California Davis Medical Center, Sacramento, California 95817, United States and VA Northern California Health Care System, Mather, CA, USA

\* Co-corresponding author: Paul T. Henderson, 4501 X Street, Suite 3016, Sacramento, CA 95817; telephone: 916-734-3772; fax: 916-734-7946; email: phenderson@ucdavis.edu.

Table S1. Table of nucleotide and amino acid mutations present in the DNA repair genes of all six breast cancer cell lines used in this study.

| Cell line  | Gene   | cDNA                 | AA                      | Classification               | FATHMM prediction | FATHMM score |
|------------|--------|----------------------|-------------------------|------------------------------|-------------------|--------------|
| MDA-MB-468 | ATR    | c.2633+5A>G          | p.?                     | Unknown                      | NEUTRAL           | 0.11506      |
| MDA-MB-468 | BLM    | c.1661A>T            | p.D554V                 | Substitution - Missense      | PATHOGENIC        | 0.99367      |
| MDA-MB-468 | BRCA2  | c.2895G>C            | p.M965I                 | Substitution - Missense      | NEUTRAL           | 0.10067      |
| MDA-MB-468 | CANX   | c.1764G>A            | p.K588K                 | Substitution - coding silent | PATHOGENIC        | 0.8761       |
| MDA-MB-468 | ERBB2  | c.454delG            | p.V153fs*2              | Deletion - Frameshift        |                   |              |
| MDA-MB-468 | FANCA  | c.2605C>T            | p.Q869*                 | Substitution - Nonsense      | PATHOGENIC        | 0.99497      |
| MDA-MB-468 | MUS81  | c.495G>A             | p.Q165Q                 | Substitution - coding silent | PATHOGENIC        | 0.81424      |
| MDA-MB-468 | PTEN   | c.253+1G>T           | p.?                     | Unknown                      | PATHOGENIC        | 0.90626      |
| MDA-MB-468 | REV1   | c.1715C>T            | p.A572V                 | Substitution - Missense      | PATHOGENIC        | 0.95603      |
| MDA-MB-468 | TP53   | c.818G>A             | p.R273H                 | Substitution - Missense      | PATHOGENIC        | 0.99523      |
| MDA-MB-468 | XRCC5  | c.1606C>T            | p.L536F                 | Substitution - Missense      | PATHOGENIC        | 0.75834      |
| BT-549     | AHCY   | c.1141G>A            | p.V381I                 | Substitution - Missense      |                   | 0.65714      |
| BT-549     | DOT1L  | c.4339_4359del21     | p.G1452_A1458delGGAASSA | Deletion - In frame          |                   |              |
| BT-549     | FANCL  | c.406A>G             | p.I136V                 | Substitution - Missense      |                   | 0.54314      |
| BT-549     | FGFR1  | c.153G>A             | p.L51L                  | Substitution - coding silent | PATHOGENIC        | 0.7364       |
| BT-549     | MUTYH  | c.1271G>T            | p.W424L                 | Substitution - Missense      | PATHOGENIC        | 0.95199      |
| BT-549     | POLQ   | c.7793A>G            | p.H2598R                | Substitution - Missense      | PATHOGENIC        | 0.97237      |
| BT-549     | PTEN   | c.821delG            | p.V275fs*1              | Deletion - Frameshift        |                   |              |
| BT-549     | TP53   | c.747G>C             | p.R249S                 | Substitution - Missense      | NEUTRAL           | 0.2434       |
| MDA-MB-231 | AR     | c.1983A>G            | p.T661T                 | Substitution - coding silent | NEUTRAL           | 0.10652      |
| MDA-MB-231 | ATM    | c.3014A>T            | p.N1005I                | Substitution - Missense      | NEUTRAL           | 0.08843      |
| MDA-MB-231 | MPG    | c.520+7A>G           | p.?                     | Unknown                      | NEUTRAL           | 0.00868      |
| MDA-MB-231 | MSH3   | c.2659G>A            | p.G887R                 | Substitution - Missense      | PATHOGENIC        | 0.98796      |
| MDA-MB-231 | MSH4   | c.2444A>G            | p.Q815R                 | Substitution - Missense      | PATHOGENIC        | 0.9816       |
| MDA-MB-231 | PNKP   | c.1126+7G>A          | p.?                     | Unknown                      | NEUTRAL           | 0.0229       |
| MDA-MB-231 | RECQL  | c.1667_1667+3delAGTA | p.?                     | Unknown                      |                   |              |
| MDA-MB-231 | TP53   | c.839G>A             | p.R280K                 | Substitution - Missense      | PATHOGENIC        | 0.99573      |
| MCF7       | ERCC6  | c.3297T>A            | p.S1099R                | Substitution - Missense      | NEUTRAL           | 0.16277      |
| MCF7       | ERCC8  | c.741A>G             | p.K247K                 | Substitution - coding silent | PATHOGENIC        | 0.83829      |
| MCF7       | HLTF   | c.859G>T             | p.V287F                 | Substitution - Missense      | PATHOGENIC        | 0.96516      |
| MCF7       | NBN    | c.127C>T             | p.R43*                  | Substitution - Nonsense      | PATHOGENIC        | 0.705        |
| MCF7       | PIK3CA | c.1633G>A            | p.E545K                 | Substitution - Missense      | PATHOGENIC        | 0.97342      |
| MCF7       | XRCC4  | c.590A>G             | p.K197R                 | Substitution - Missense      | PATHOGENIC        | 0.95478      |
| Hs-578-T   | EXO1   | c.1514+4T>C          | p.?                     | Unknown                      | NEUTRAL           | 0.09544      |
| Hs-578-T   | POLD3  | c.1030T>C            | p.Y344H                 | Substitution - Missense      | PATHOGENIC        | 0.70197      |
| Hs-578-T   | POLE   | c.6012C>T            | p.I2004I                | Substitution - coding silent | NEUTRAL           | 0.04781      |
| Hs-578-T   | POLQ   | c.7126C>T            | p.R2376*                | Substitution - Nonsense      | PATHOGENIC        | 0.95276      |
| Hs-578-T   | TP53   | c.469G>T             | p.V157F                 | Substitution - Missense      | NEUTRAL           | 0.24495      |
| T47D       | EHMT1  | c.136G>T             | p.A46S                  | Substitution - Missense      | NEUTRAL           | 0.08978      |
| T47D       | PRDX2  | c.520G>A             | p.A174T                 | Substitution - Missense      | PATHOGENIC        | 0.95722      |
| T47D       | PIK3CA | c.3140A>G            | p.H1047R                | Substitution - Missense      | PATHOGENIC        | 0.96139      |
| T47D       | TP53   | c.580C>T             | p.L194F                 | Substitution - Missense      | PATHOGENIC        | 0.99165      |
